# Supplementary material
Source: publisher figshare collection journal article supplement (https://acs.figshare.com/ndownloader/files/4190287)
Supplement: Supplementary file 1 [file 4190287]

## *Supporting Information For*

# **Low Temperature Synthesis of Magic-Sized CdSe Nanoclusters: Influence of Ligands on Nanocluster Growth and Photophysical Properties**

*John C. Newton,<sup>§,‡</sup> Karthik Ramasamy,<sup>§,‡,†</sup> Manik Mandal,<sup>§</sup> Gayatri K. Joshi,<sup>§</sup> Amar*

*Kumbhar,<sup>#</sup> and Rajesh Sardar<sup>§,\*</sup>*

<sup>§</sup>Department of Chemistry & Chemical Biology, Indiana University Purdue University Indianapolis, 402 N. Blackford Street, Indianapolis, IN 46202, United States.

<sup>§</sup>Department of Chemistry, Lehigh University, Seeley Mudd Building, 6 East Packer Avenue, Bethlehem, PA 18015, United States. <sup>#</sup>Chapel Hill Analytical and Nanofabrication Laboratory, University of North Carolina, Chapel Hill, NC 27599, United States. <sup>‡</sup>These authors contributed equally.

E-mail: rsardar@iupui.edu

## **-Table of Contents-**

**SI-Figure 1.** UV-visible absorption spectra of magic-sized, CdSe NC formation during the early stages of synthesis.

**SI-Figure 2.** High-resolution TEM (HRTEM) image of TOPO-capped CdSe NCs. The diameter of the NC was determined to be 1.8 nm. The scale bar is 5 nm.

**SI-Figure 3.** Energy dispersive X-ray spectrum of TOPO\_capped CdSe NCs. The atomic ratio between Cd and Se was found to be 1.1:1.0.

**SI-Figure 4.** UV-visible absorption spectra of CdSe NCs at different points of synthesis at 85 °C. The blue and black lines represent the spectrum of the sample taken two and 10 hours after TOPSe injection, respectively.

**SI-Figure 5.** <sup>31</sup>P{<sup>1</sup>H} NMR spectra of different purity of TOPO samples collected in *d*<sub>6</sub>-acetone.

**SI-Figure 6.** <sup>31</sup>P{<sup>1</sup>H} NMR spectra of TOPSe samples collected in *d*<sub>8</sub>-toluene.

**SI-Figure 7.** (A) UV-visible absorption spectra of CdSe NCs at different points of synthesis using 90% TOPO and 97% TOPSe. (B) UV-visible absorption

spectra of CdSe NCs at different points of synthesis using recrystallized TOPO and vacuum distilled TOPSe.

**SI-Figure 8.** Powder XRD of OA-capped CdSe NCs, synthesized at 70 °C. The low angle peak positions are 5.0 and 7.1°.

**SI-Figure 9.** TEM image of LA-stabilized CdSe NCs. The scale bar is 20 nm.

**SI-Figure 10.** Absorption (red) and emission (blue) spectra of TOA-capped CdSe NCs.

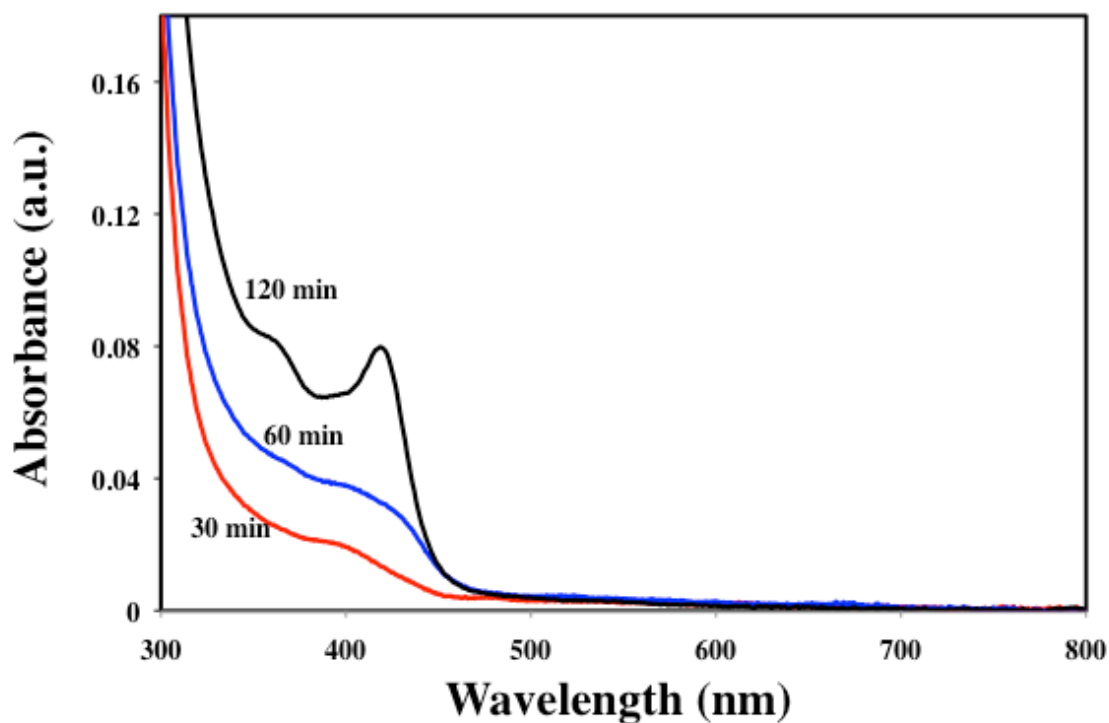

**SI-Figure 1.** UV-visible absorption spectra of magic-sized, CdSe NC formation during the early stages of synthesis.

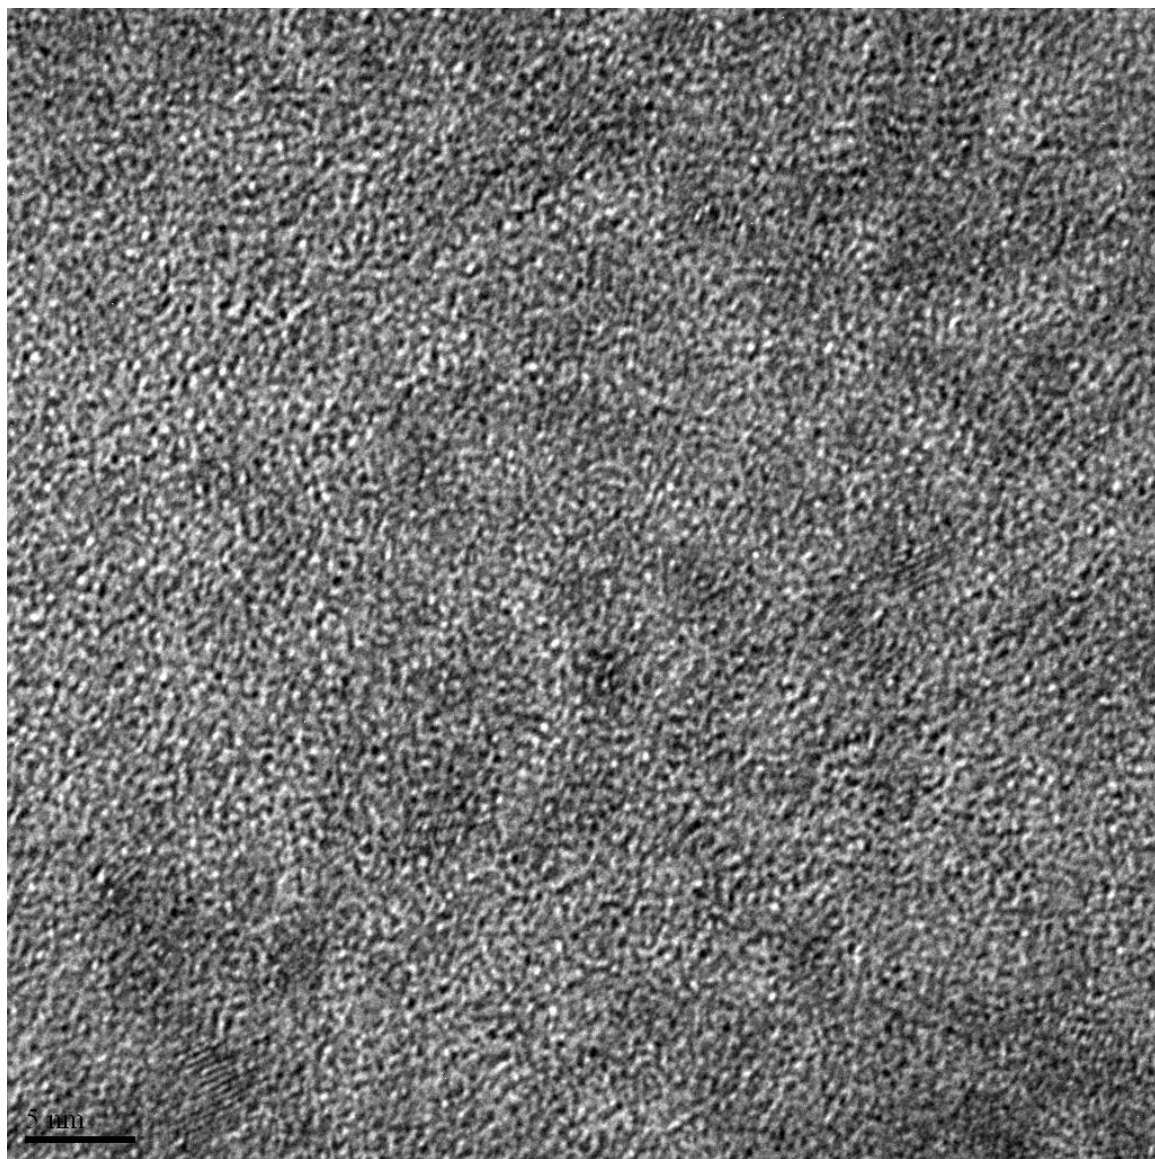

**SI-Figure 2.** High-resolution TEM (HRTEM) image of TOPO-capped CdSe NCs. The diameter of the NC was determined to be 1.8 nm. The scale bar is 5 nm.

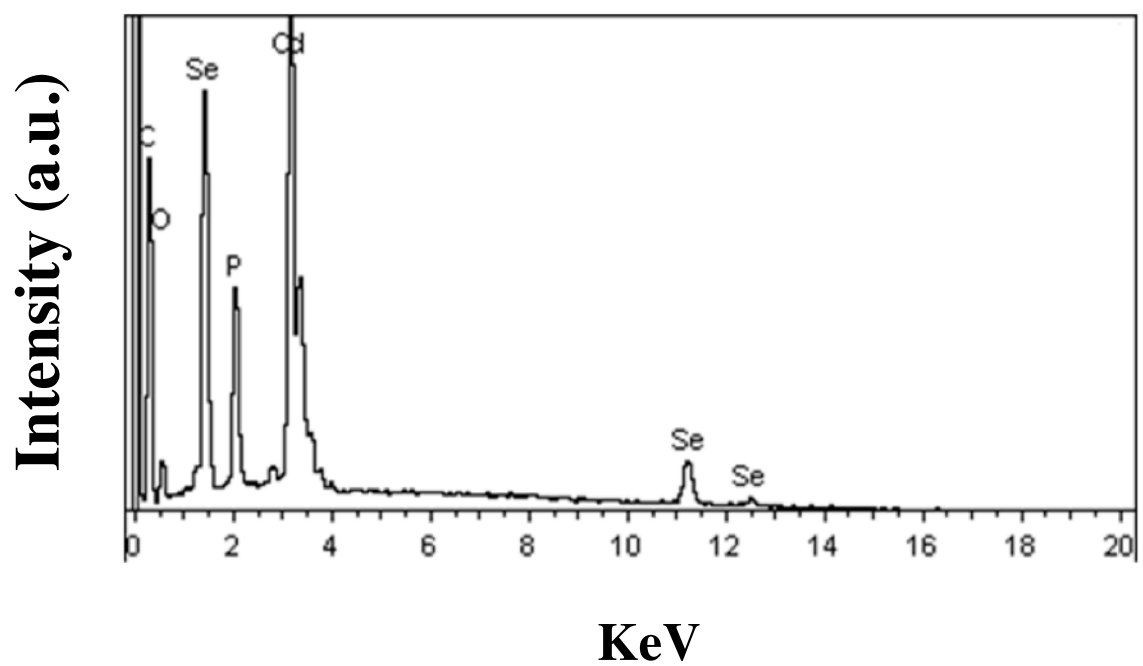

**SI-Figure 3.** Energy dispersive X-ray spectrum of TOPO-capped CdSe NCs. The atomic ratio between Cd and Se was found to be 1.1:1.0.

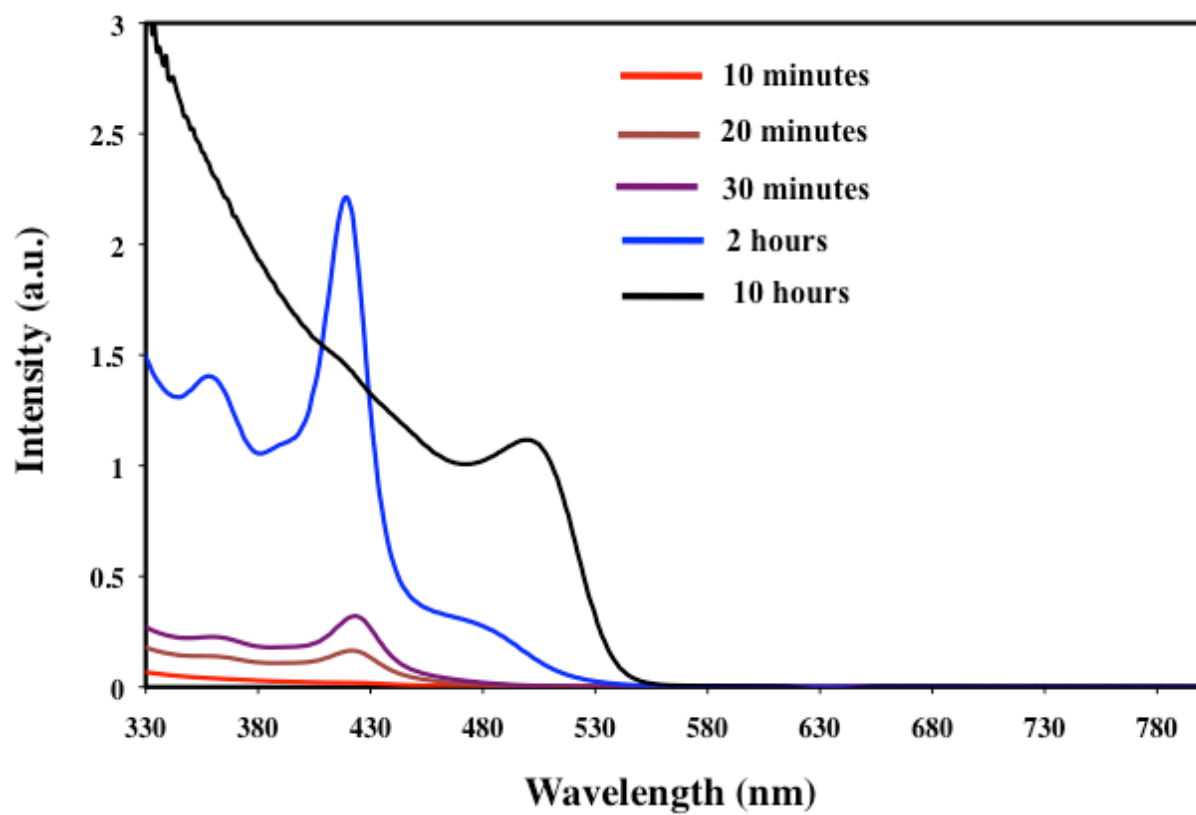

**SI-Figure 4.** UV-visible absorption spectra of CdSe NCs at different points of synthesis at 85 °C. The spectra of the sample were taken after TOPSe injection.

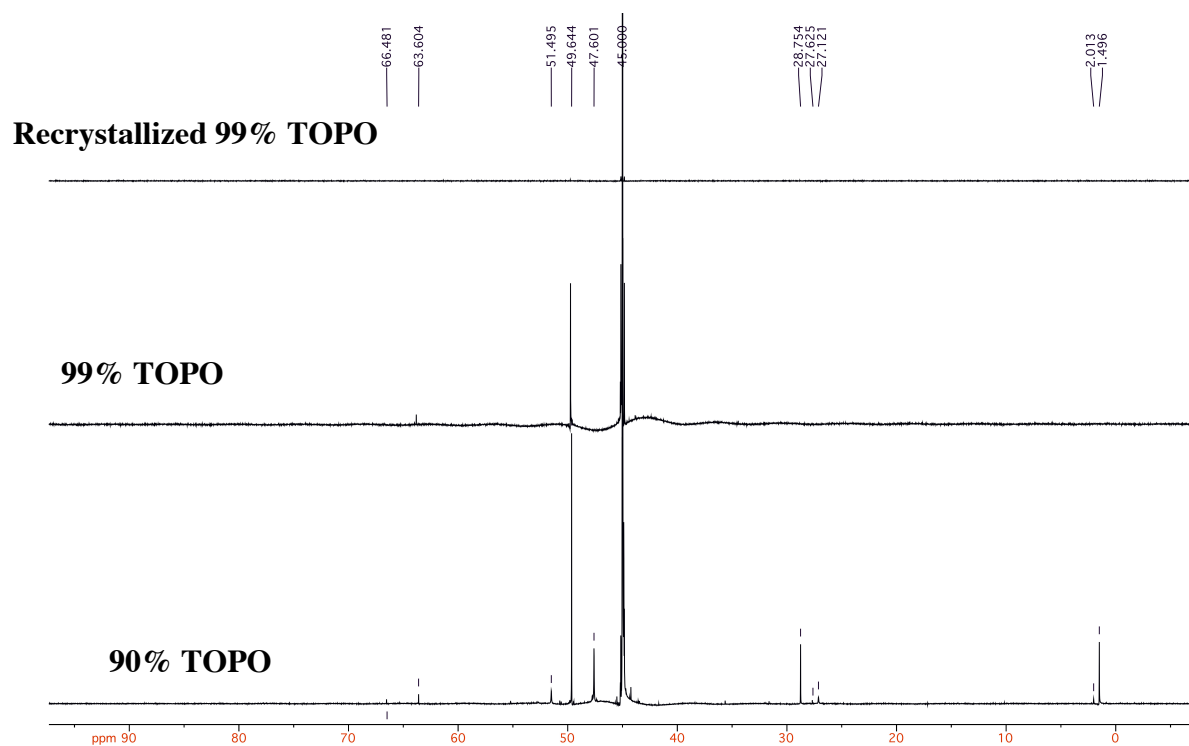

**SI-Figure 5.**  $^{31}\text{P}\{^1\text{H}\}$  NMR spectra of different purity TOPO samples collected in  $d_6$ -acetone.

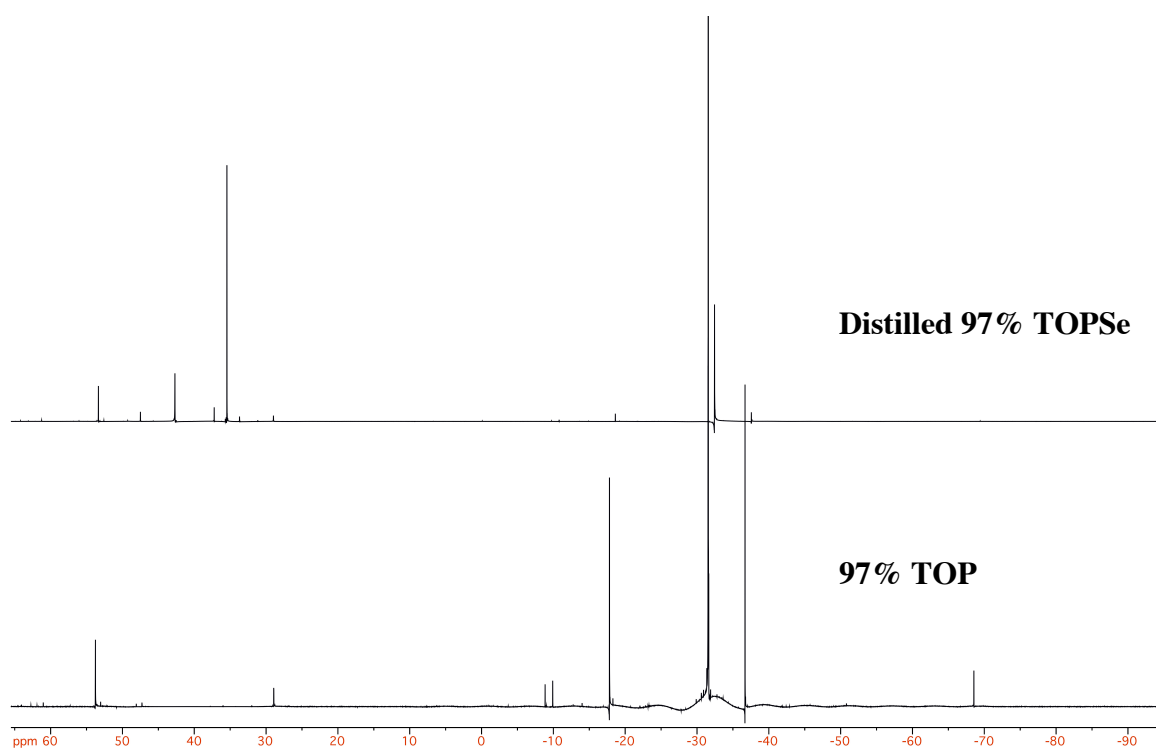

**SI-Figure 6.**  $^{31}\text{P}\{^1\text{H}\}$  NMR spectra of TOPSe and TOP samples collected in  $d_8$ -toluene.

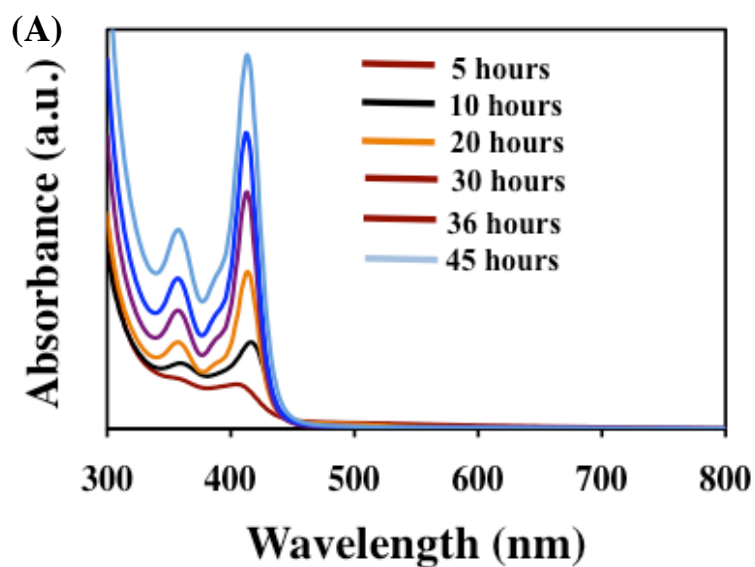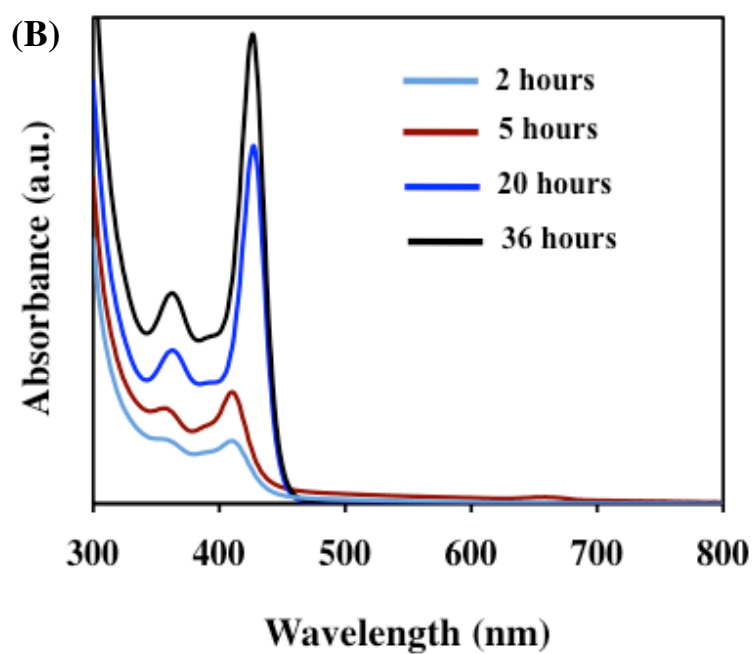

**SI-Figure 7.** (A) UV-visible absorption spectra of CdSe NCs at different points of synthesis using 90% TOPO and 97% TOPSe. (B) UV-visible absorption spectra of CdSe NCs at different points of synthesis using recrystallized TOPO and vacuum distilled TOPSe.



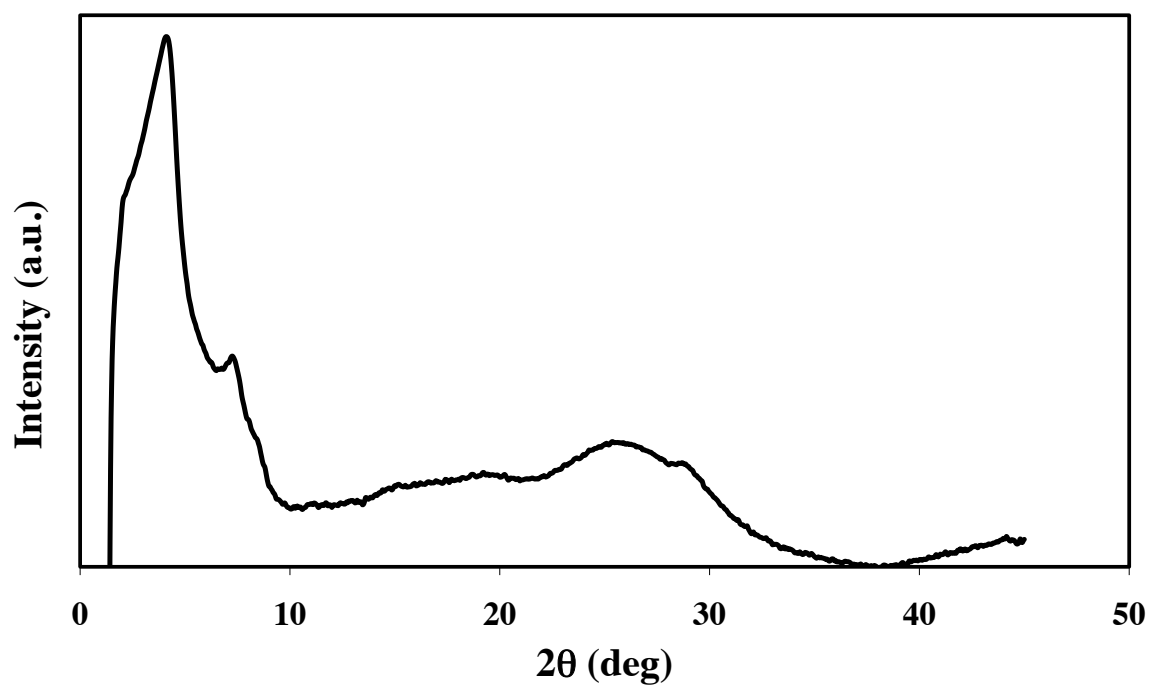

**SI-Figure 8.** Powder XRD of OA-capped CdSe NCs synthesized at 70 °C. The low angle peak positions are at 5.0 and 7.1°.

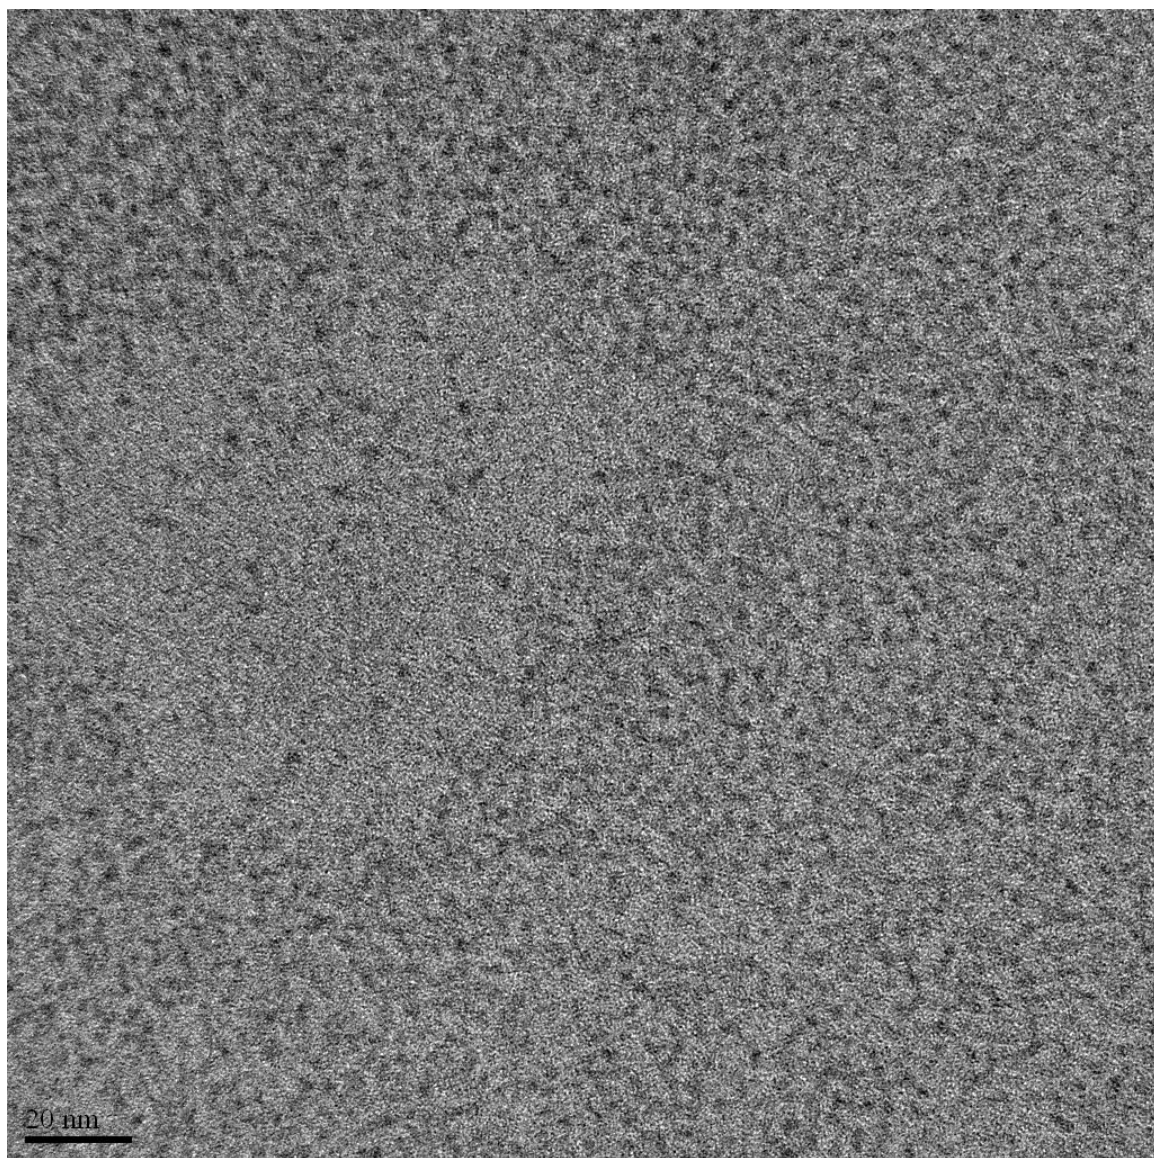

**SI-Figure 9.** TEM image of LA-stabilized CdSe NCs. The scale bar is 20 nm.

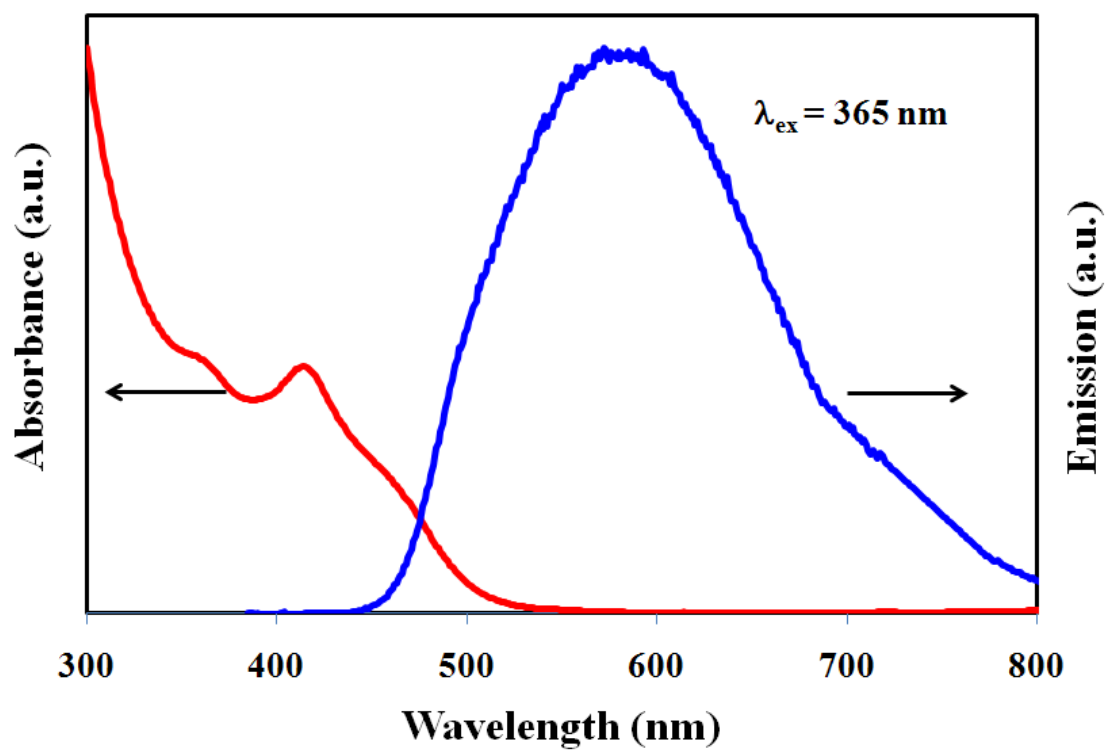

**SI-Figure 10.** Absorption (red) and emission (blue) spectra of TOA-capped CdSe NCs.
